# Supplementary material
Source: Springer Nature journal article supplement (https://www.springermedizin.de/resource/supplementary/12936_2011_1863_MOESM5_ESM.pdf/9541942)

parasitaemia as % from admission  
(individual data)

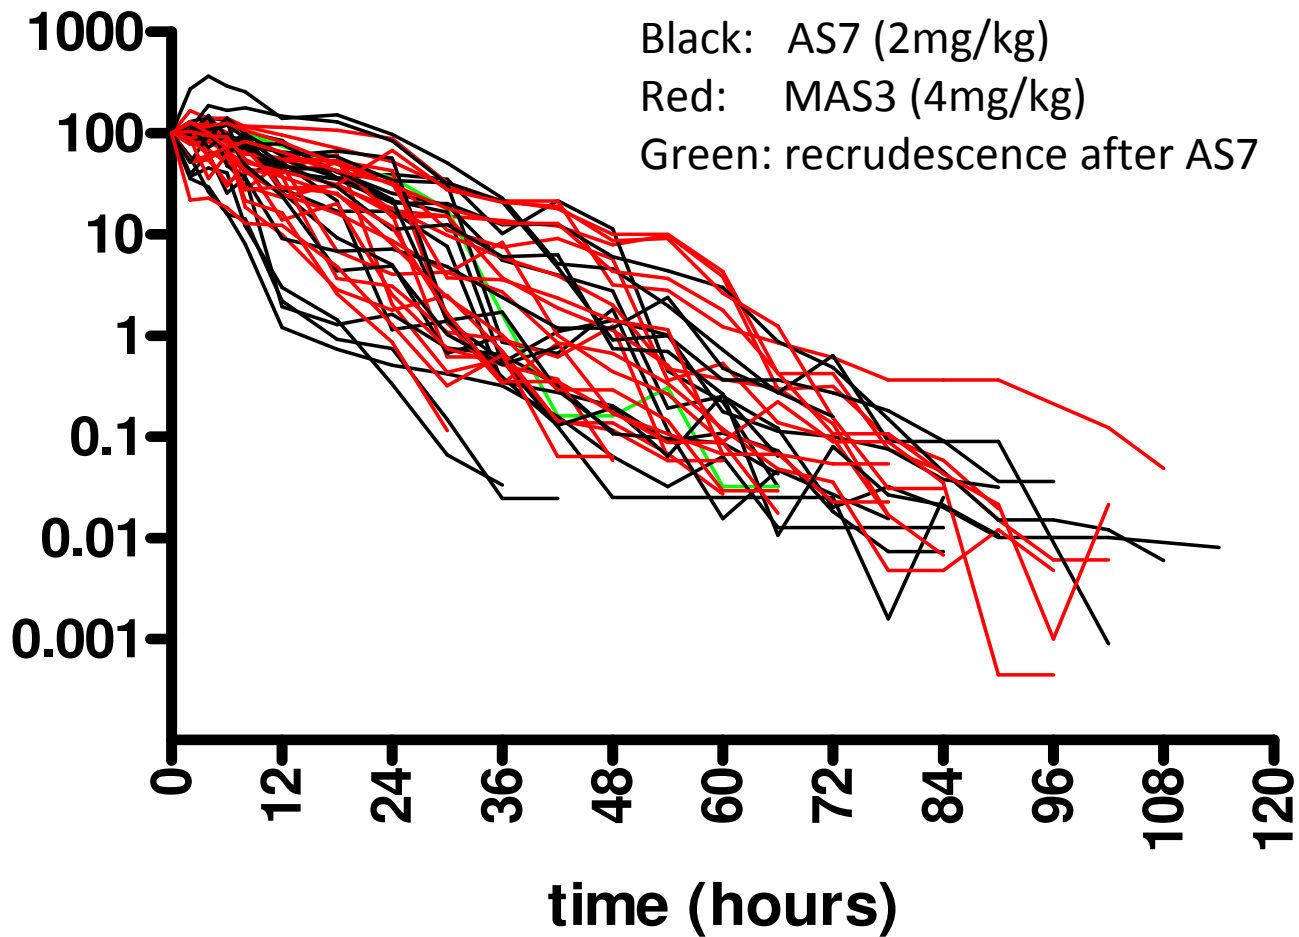

Supplement: MOESM5 [file 9541942]
